# Supplementary material
Source: PubMed Central journal article supplement (PMC5249662)
Supplement: NIHMS834416-supplement-Supplemental_Tables.pdf [file NIHMS834416-supplement-Supplemental_Tables.pdf]

**Appendix A. Regression Result for the Association between Repeated Measures of Non-Combusted Product Use and Combusted Product Use**

| Variable                                                | Level                                                                  | Regression Coefficient Estimate | Standard Error | 95% Confidence Interval |              | P-value         |
|---------------------------------------------------------|------------------------------------------------------------------------|---------------------------------|----------------|-------------------------|--------------|-----------------|
| <b>Intercept</b>                                        |                                                                        | 0.36                            | 1.59           | -2.75                   | 3.47         | 0.82            |
| <b>Amount of non-combusted product use per day</b>      |                                                                        | <b>-0.42</b>                    | <b>0.12</b>    | <b>-0.66</b>            | <b>-0.18</b> | <b>&lt;0.01</b> |
| <b>Condition (Reference: NNC)</b>                       | VLNC1                                                                  | -2.04                           | 0.96           | -3.91                   | -0.17        | 0.03            |
|                                                         | VLNC2                                                                  | -1.59                           | 1.16           | -3.86                   | 0.68         | 0.17            |
| <b>Time window (Reference: Week 6 -Week 8)</b>          | Week 0 - week 1 (excluding the randomization day and week 1 visit day) | 3.88                            | 0.73           | 2.45                    | 5.30         | <0.0001         |
|                                                         | Week 1 - week 2 (excluding the week 2 visit day)                       | 2.80                            | 0.62           | 1.59                    | 4.01         | <0.0001         |
|                                                         | Week 2 - week 3 (excluding the week 3 visit day)                       | 2.14                            | 0.48           | 1.20                    | 3.09         | <0.0001         |
|                                                         | Week 3 - week 4 (excluding the week 4 visit day)                       | 0.93                            | 0.43           | 0.08                    | 1.78         | 0.03            |
|                                                         | Week 4 - week 6 (excluding the week 6 visit day)                       | 0.35                            | 0.35           | -0.35                   | 1.04         | 0.32            |
| <b>Baseline amount of combusted product use per day</b> |                                                                        | 1.05                            | 0.09           | 0.88                    | 1.23         | <0.0001         |

Marginal Generalized Estimating Equations (GEE) model for the repeated measures of amount of combusted product use during each visit, with the non-combusted product use as the independent variable, adjusting for week, experimental condition, and the baseline amount of combusted product use per day.

**Appendix B. Regression Result for the Association between Repeated Measures of Non-Combusted Product Use and Number of 24-hour Abstinence Attempts**

| Variable                                           | Level                                                                  | Regression Coefficient Estimate | Standard Error | 95% Confidence Interval |             | P-value          |
|----------------------------------------------------|------------------------------------------------------------------------|---------------------------------|----------------|-------------------------|-------------|------------------|
| <b>Intercept</b>                                   |                                                                        | -4.51                           | 0.68           | -5.84                   | - 3.17      | <0.0001          |
| <b>Amount of non-combusted product use per day</b> |                                                                        | <b>0.08</b>                     | <b>0.02</b>    | <b>0.04</b>             | <b>0.13</b> | <b>&lt;0.001</b> |
| <b>Condition (Reference: NNC)</b>                  | VLNC1                                                                  | 2.09                            | 0.81           | 0.50                    | 3.68        | 0.01             |
|                                                    | VLNC2                                                                  | 2.35                            | 0.77           | 0.83                    | 3.87        | <0.01            |
| <b>Time window (Reference: Week 6 -Week 8)</b>     | Week 0 - week 1 (excluding the randomization day and week 1 visit day) | -2.52                           | 0.66           | -3.81                   | - 1.22      | 0.0001           |
|                                                    | Week 1 - week 2 (excluding the week 2 visit day)                       | -1.41                           | 0.46           | -2.31                   | - 0.52      | <0.01            |
|                                                    | Week 2 - week 3 (excluding the week 3 visit day)                       | -1.04                           | 0.31           | -1.65                   | - 0.42      | 0.001            |
|                                                    | Week 3 - week 4 (excluding the week 4 visit day)                       | -0.56                           | 0.26           | -1.08                   | - 0.05      | 0.03             |
|                                                    | Week 4 - week 6 (excluding the week 6 visit day)                       | -0.37                           | 0.18           | -0.72                   | - 0.02      | 0.04             |

Marginal Generalized Estimating Equations (GEE) model for the repeated measures of 24-hour abstinence attempts, with the non-combusted product use as the independent variable, adjusting for week and experimental condition.

**Appendix C. Regression Result for the Association between Repeated Measures of Non-Combusted Product Use and Carbon Monoxide (CO) Level**

| Variable                                           | Level                                                                  | Regression Coefficient Estimate | Standard Error | 95% Confidence Interval |             | P-value     |
|----------------------------------------------------|------------------------------------------------------------------------|---------------------------------|----------------|-------------------------|-------------|-------------|
| <b>Intercept</b>                                   |                                                                        | 1.38                            | 1.69           | -1.92                   | 4.69        | 0.41        |
| <b>Amount of non-combusted product use per day</b> |                                                                        | <b>-0.14</b>                    | <b>0.11</b>    | <b>-0.36</b>            | <b>0.09</b> | <b>0.23</b> |
| <b>Condition (Reference: NNC)</b>                  | VLNC1                                                                  | -2.00                           | 1.18           | -4.33                   | 0.32        | 0.09        |
|                                                    | VLNC2                                                                  | -3.48                           | 1.09           | -5.63                   | -1.34       | <0.01       |
| <b>Time window (Reference: Week 6 -Week 8)</b>     | Week 0 - week 1 (excluding the randomization day and week 1 visit day) | 2.37                            | 1.12           | 0.17                    | 4.57        | 0.03        |
|                                                    | Week 1 - week 2 (excluding the week 2 visit day)                       | 2.21                            | 0.98           | 0.30                    | 4.12        | 0.02        |
|                                                    | Week 2 - week 3 (excluding the week 3 visit day)                       | 0.68                            | 0.93           | -1.13                   | 2.50        | 0.46        |
|                                                    | Week 3 - week 4 (excluding the week 4 visit day)                       | 0.87                            | 0.97           | -1.02                   | 2.77        | 0.37        |
|                                                    | Week 4 - week 6 (excluding the week 6 visit day)                       | 0.41                            | 0.81           | -1.18                   | 1.99        | 0.62        |
| <b>Baseline CO level</b>                           |                                                                        | 1.05                            | 0.08           | 0.90                    | 1.20        | <.0001      |

Marginal Generalized Estimating Equations (GEE) model for the repeated measures of CO at each visit, with the non-combusted product use as the independent variable, adjusting for week, experimental condition, and the baseline CO level.

**Appendix D. Regression Result for the Association between Repeated Measures of Non-Combusted Product Use and TNE Adjusted per Creatinine Level (Log-Transformed)**

| Variable                                           | Level                                                                  | Regression Coefficient Estimate | Standard Error | 95% Confidence Interval |             | P-value     |
|----------------------------------------------------|------------------------------------------------------------------------|---------------------------------|----------------|-------------------------|-------------|-------------|
| <b>Intercept</b>                                   |                                                                        | 0.32                            | 0.94           | -1.52                   | 2.15        | 0.74        |
| <b>Amount of non-combusted product use per day</b> |                                                                        | <b>0.03</b>                     | <b>0.03</b>    | <b>-0.02</b>            | <b>0.09</b> | <b>0.23</b> |
| <b>Condition (Reference: NNC)</b>                  | VLNC1                                                                  | -0.85                           | 0.20           | -1.25                   | -0.45       | <.0001      |
|                                                    | VLNC2                                                                  | -1.27                           | 0.19           | -1.64                   | -0.90       | <.0001      |
| <b>Time window (Reference: Week 4 -Week 8)</b>     | Week 0 - week 4 (excluding the randomization day and week 4 visit day) | -0.16                           | 0.09           | -0.32                   | 0.01        | 0.07        |
| <b>Baseline TNE level (Log-Transformed)</b>        |                                                                        | 0.91                            | 0.25           | 0.42                    | 1.40        | <0.001      |

Marginal Generalized Estimating Equations (GEE) model for the repeated measures of TNE level (log-transformed) at weeks 4 and 8, with the non-combusted product use as the independent variable, adjusting for week, experimental condition, and the baseline TNE level.

**Appendix E. Regression Result for the Association between Repeated Measures of Non-Combusted Product Use and Total NNAL Adjusted per Creatinine Level (Log-Transformed)**

| Variable                                           | Level                                                                  | Regression Coefficient Estimate | Standard Error | 95% Confidence Interval |              | P-value          |
|----------------------------------------------------|------------------------------------------------------------------------|---------------------------------|----------------|-------------------------|--------------|------------------|
|                                                    |                                                                        |                                 |                |                         |              |                  |
| <b>Intercept</b>                                   |                                                                        | -0.07                           | 0.12           | -0.31                   | 0.16         | 0.54             |
| <b>Amount of non-combusted product use per day</b> |                                                                        | <b>-0.07</b>                    | <b>0.02</b>    | <b>-0.11</b>            | <b>-0.03</b> | <b>&lt;0.001</b> |
| <b>Condition (Reference: NNC)</b>                  | VLNC1                                                                  | -0.20                           | 0.19           | -0.58                   | 0.18         | 0.31             |
|                                                    | VLNC2                                                                  | -0.61                           | 0.16           | -0.93                   | -0.29        | <0.001           |
| <b>Time window (Reference: Week 4 -Week 8)</b>     | Week 0 - week 4 (excluding the randomization day and week 4 visit day) | 0.06                            | 0.07           | -0.07                   | 0.19         | 0.38             |
| <b>Baseline total NNAL level (Log-Transformed)</b> |                                                                        | 0.72                            | 0.13           | 0.47                    | 0.97         | <.0001           |

Marginal Generalized Estimating Equations (GEE) model for the repeated measures of total NNAL per creatinine level (log-transformed) at weeks 4 and 8, with the non-combusted product use as the independent variable, adjusting for week, experimental condition, and the baseline total NNAL per creatinine level.

**Appendix F. Alternative Tobacco Product Use, Amount of Cigarettes Smoked and Carbon Monoxide Levels at the Follow-up Visit (i.e., 12 Weeks Post Intervention) Compared to Baseline**

|                                                         | <b>Follow-up<br/>N = 95</b> | <b>Baseline<sup>1</sup><br/>N = 95</b> | <b>Change<br/>(follow-up<br/>minus<br/>Baseline)</b> | <b>Test</b>          | <b>P-<br/>value</b> |
|---------------------------------------------------------|-----------------------------|----------------------------------------|------------------------------------------------------|----------------------|---------------------|
| <b>Alternative tobacco product use (N, %)</b>           | 28 (29%)                    | 23 (24%)                               | 5%                                                   | McNemar              | 0.35                |
| <b>Cigarettes smoked per day (mean, SD)</b>             | 12.14 (7.73)                | 15.02 (6.89)                           | -2.88 (6.75)                                         | Paired t             | <0.001              |
| <b>CO, ppm (mean, SD)</b>                               | 16.67 (9.13)                | 16.94 (7.32)                           | -0.26 (7.57)                                         | Paired t             | 0.74                |
| <b>TNE, nmol/mg creatinine (geometric mean, 95% CI)</b> | 28.90 (21.21, 39.39)        | 33.47 (29.43, 38.08)                   | 25% (75%) <sup>2</sup>                               | Wilcoxon signed rank | 0.02                |

<sup>1</sup>Baseline data of the 95 subjects who had a corresponding follow-up measurement.

<sup>2</sup>Mean percent change (SD).
